# Supplementary material
Source: publisher site journal article supplement (https://www.spandidos-publications.com/5034/downloadSupplementary)

Figure S1. HSC-3 stable cell lines expressing mVenus, mVenus-CD or mVenus-TK. (A) Amplification of sequence around the ROSA26 locus insertion site from the HSC-3 mVenus, mVenus-CD, or mVenus-TK cells. (B) Growth curve of HSC-3 stable cell lines expressing mVenus, mVenus-CD or mVenus-TK. A total of 5,000 cells was seeded into one well of 96-well plate. Cell viability was measured every 24 h via MTT assay. Data are presented as the mean  $\pm$  standard deviation of three samples. CD, cytosine deaminase; TK, thymidine kinase; OD, optical density; WT, wild-type.

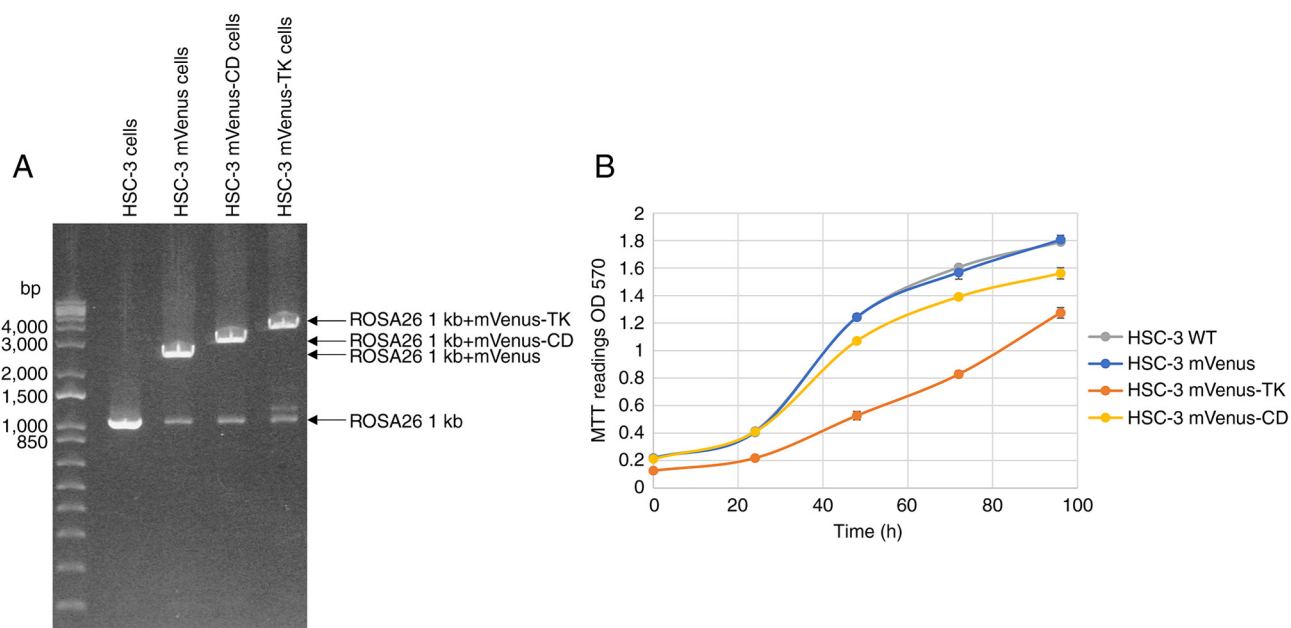

Figure S2. Comparison of time-course response of HSC-3 cells to prodrug treatments. Time-course response curves of HSC-3 cells to GCV and 5-FU treatment in this study were plotted together.

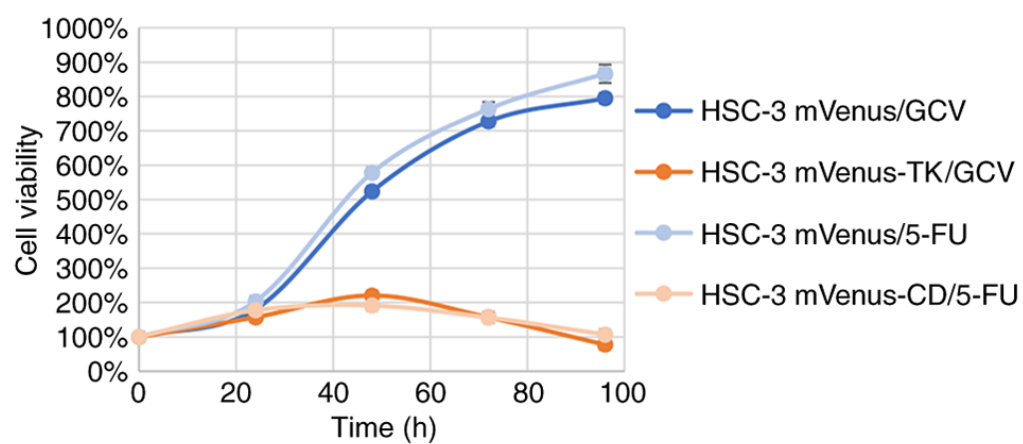

Supplement: Supplementary file 1 [file downloadSupplementary]
